# Supplementary material for: Determinants of the Presence and Size of Intracranial Aneurysms in the General Population: The Rotterdam Study
Source: PubMed Central journal article supplement — Stroke. 2020 Jun 10;51(7):2103–10. doi: 10.1161/STROKEAHA.120.029296 (PMC7306261; doi:10.1161/strokeaha.120.029296), 2020-06-10
Supplement: str-51-2103-s001.pdf [file str-51-2103-s001.pdf]

**Supplementary Material**

**Determinants of the Presence and Size of Intracranial Aneurysms in the General Population: the Rotterdam Study**

**Supplementary Table I. Determinants of Volume of Unruptured Intracranial Aneurysms in Males**

**Supplementary Table II. Determinants of Volume of Unruptured Intracranial Aneurysms in Females**

**TABLE I. Determinants of Volume of Unruptured Intracranial Aneurysms in Males**

|                                           | Difference in Aneurysm Volume (mm <sup>3</sup> per unit increase*) |                          |
|-------------------------------------------|--------------------------------------------------------------------|--------------------------|
|                                           | Model 1                                                            | Model 2                  |
| <b>CARDIOVASCULAR</b>                     |                                                                    |                          |
| Female sex                                | -                                                                  | -                        |
| Age (per 10 years)                        | -6.66 (-15.4 ; 2.05)                                               | -38.7 (-137.0 ; 59.6)    |
| BMI (per kg/m <sup>2</sup> )              | -9.44 (-37.7 ; 18.8)                                               | -23.8 (-55.5 ; 7.81)     |
| Hypertension                              | -156.9 (-379.9 ; 66.1)                                             | -169.7 (-407.3 ; 67.9)   |
| Smoking                                   |                                                                    |                          |
| <i>Never smoking</i>                      | Ref.                                                               | Ref.                     |
| <i>Previous smoking</i>                   | 88.7 (-218.5 ; 395.6)                                              | -15.9 (-332.2 ; 300.4)   |
| <i>Current smoking</i>                    | 57.6 (-253.3 ; 368.5)                                              | -92.6 (-419.2 ; 234.0)   |
| Hypercholesterolemia                      | 49.3 (-119.9 ; 218.4)                                              | 124.7 (-68.6 ; 317.9)    |
| Diabetes Mellitus                         | 211.8 (-60.1 ; 483.7)                                              | 345.0 (39.9 ; 650.1)     |
| CVD history                               | -13.9 (-207.8 ; 179.9)                                             | -110.8 (-338.9 ; 117.25) |
| <b>LIFESTYLE</b>                          |                                                                    |                          |
| Diet quality score (per point increase)   | -27.8 (-71.7 ; 16.0)                                               | -19.6 (-73.1 ; 34.0)     |
| Physical activity (per 10 MET-hours/week) | -5.29 (-18.4 ; 7.83)                                               | -1.7 (-18.3 ; 14.8)      |
| Alcohol (per glass/day)                   | 3.11 (-4.46 ; 10.7)                                                | 3.01 (-5.25 ; 11.3)      |
| <b>INFLAMMATORY</b>                       |                                                                    |                          |
| CRP (per mg/L)                            | -32.2 (-130.6 ; 66.3)                                              | -61.7 (-277.4 ; 154.0)   |
| WBC count (per 1 x 10 <sup>9</sup> /L)    | 16.8 (-25.2 ; 58.6)                                                | 11.4 (-34.7 ; 57.4)      |
| <b>HORMONAL</b>                           |                                                                    |                          |
| Estradiol (per 100 pmol/L)                | -123.2 (-792.5 ; 546.0)                                            | 229.1 (-1169 ; 1628)     |

Missing values for this analysis were present for diet score (22.5%), physical activity (50%), CRP (60%) and estradiol (60%). CVD indicates history of stroke or coronary heart disease, meaning history of myocardial infarction or percutaneous coronary intervention. CRP indicates C-reactive protein.

Values represent difference in aneurysm volume with 95% CI. 40 participants included in analysis.

Model 1: Adjusted for sex and age

Model 2: Adjusted for sex, age, BMI, hypertension, smoking status, hypercholesterolemia, CVD history, and diabetes mellitus.

\*Unless indicated differently

**TABLE II. Determinants of Volume of Unruptured Intracranial Aneurysms in Females**

|                                           | Difference in Aneurysm Volume (mm <sup>3</sup> per unit increase*) |                         |
|-------------------------------------------|--------------------------------------------------------------------|-------------------------|
|                                           | Model 1                                                            | Model 2                 |
| <b>CARDIOVASCULAR</b>                     |                                                                    |                         |
| Female sex                                | -                                                                  | -                       |
| Age (per 10 years)                        | 51.3 (-3.9 ; 106.4)                                                | 32.9 (-36.8 ; 100.7)    |
| BMI (per kg/m <sup>2</sup> )              | -9.5 (-25.9 ; 6.8)                                                 | -11.2 (-28.8 ; 6.5)     |
| Hypertension                              | 42.8 (-117.3 ; 203.0)                                              | 67.7 (-105.4 ; 240.8)   |
| Smoking                                   |                                                                    |                         |
| <i>Never smoking</i>                      | Ref.                                                               | Ref.                    |
| <i>Previous smoking</i>                   | -77.9 (-251.2 ; 95.3)                                              | -96.3 (-276.0 ; 83.4)   |
| <i>Current smoking</i>                    | -82.3 (-282.7 ; 118.1)                                             | -116.5 (-328.0 ; 94.9)  |
| Hypercholesterolemia                      | 78.9 (-57.2 ; 215.0)                                               | 65.7 (-76.3 ; 207.8)    |
| Diabetes Mellitus                         | -115.1 (-371.6 ; 141.3)                                            | -108.1 (-387.0 ; 170.7) |
| CVD history                               | 14.6 (-218.6 ; 247.7)                                              | 54.8 (-198.3 ; 307.8)   |
| <b>LIFESTYLE</b>                          |                                                                    |                         |
| Diet quality score (per point increase)   | -5.54 (-28.4 ; 17.3)                                               | -6.44 (-30.0 ; 17.2)    |
| Physical activity (per 10 MET-hours/week) | -16.2 (-45.5 ; 13.1)                                               | -21.7 (-52.7 ; 9.3)     |
| Alcohol (per glass/day)                   | 0.6 (-9.5 ; 10.7)                                                  | 0.83 (-9.7 ; 11.4)      |
| <b>INFLAMMATORY</b>                       |                                                                    |                         |
| CRP (per mg/L)                            | -4.73 (-25.4 ; 15.9)                                               | -0.89 (-27.4 ; 25.6)    |
| WBC count (per 1 x 10 <sup>9</sup> /L)    | 29.4 (-5.2 ; 64.0)                                                 | 37.0 (-0.4 ; 74.5)      |
| <b>HORMONAL</b>                           |                                                                    |                         |
| Estradiol (per 100 pmol/L)                | 0.33 (-24.6 ; 25.2)                                                | 0.58 (-28.2 ; 27.1)     |

Missing values for this analysis were present for diabetes mellitus (2.2%), diet score (23.3%), physical activity (45.6%), alcohol intake (5.6%), CRP (48.9%), WBC count (2.2%) and estradiol (48.9%). CVD indicates history of stroke or coronary heart disease, meaning history of myocardial infarction or percutaneous coronary intervention. CRP indicates C-reactive protein.

Values represent difference in aneurysm volume with 95% CI. 90 participants included in analysis.

Model 1: Adjusted for sex and age

Model 2: Adjusted for sex, age, BMI, hypertension, smoking status, hypercholesterolemia, CVD history, and diabetes mellitus.

\*Unless indicated differently
